# Supplementary material
Source: HighWire-hosted journal article supplement (http://jpet.aspetjournals.org/highwire/filestream/135601/field_highwire_adjunct_files/0/JPET183533_Sup._Fig._2.pdf)
Supplement: JPET183533_Sup._Fig._2.pdf [file JPET183533_Sup._Fig._2.pdf]

## Supplemental figure 2

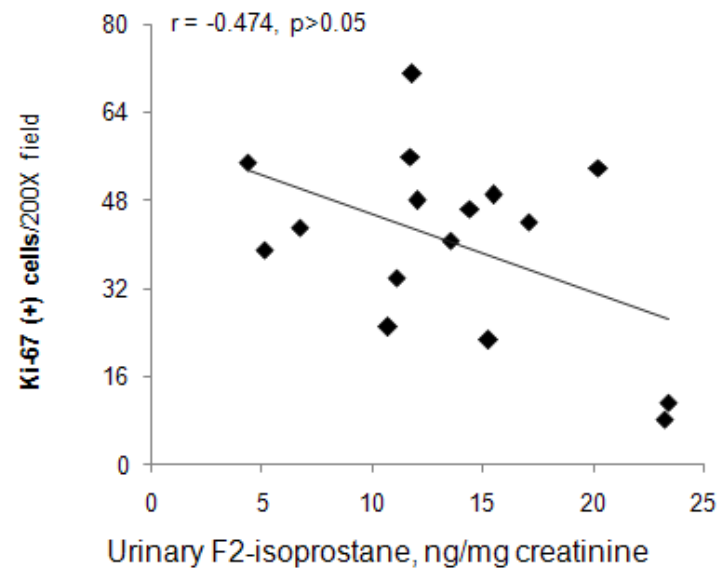

### **The lack of association between cell proliferation and oxidative stress in SW480 xenografts**

Tissue sections of the xenografts were examined histologically for Ki-67 expression as in Methods. The urinary F2-isoprostane levels were determined as in Methods. The degree of association between Ki-67 (*y axis*) in SW480 xenografts and urinary F2-isoprostane (*x axis*) in the nude mice of all three study groups is shown.

Article title: Oxidative stress mediates through apoptosis the anticancer effect of phospho-NSAIDs: Implications for the role of oxidative stress in the action of anticancer agents

Yu Sun, Liqun Huang, Gerardo G. Mackenzie, Basil Rigas

Journal: JPET
